# Supplementary material for: Efficacy of Crataegus Extract Mixture on Body Fat and Lipid Profiles in Overweight Adults: A 12-Week, Randomized, Double-Blind, Placebo-Controlled Trial
Source: MDPI journal article supplement (doi:10.3390/nu16040494), 2024-02-08
Supplement: s1 [file s1]

**Table S1.** Serum lipids concentrations of per-protocol population after 12 weeks of CEM treatment.

| Change in Lipid Profiles <sup>1</sup> | CEM<br>840 mg/day<br>(N = 21) | CEM<br>1,200 mg/day<br>(N = 27) | Placebo<br>(N = 23) | P value <sup>2</sup> |
|---------------------------------------|-------------------------------|---------------------------------|---------------------|----------------------|
| Triglycerides (mg/dL)                 | -24.1 (11.0) <sup>3</sup>     | <b>-28.4 (9.7) *</b>            | 4.3 (10.2)          | <b>0.049</b>         |
| Total cholesterol (mg/dL)             | -5.9 (5.8)                    | -0.8 (5.1)                      | 4.9 (5.3)           | 0.387                |
| HDL-C (mg/dL)                         | -1.0 (2.0)                    | 2.4 (1.7)                       | 0.6 (1.8)           | 0.437                |
| LDL-C (mg/dL)                         | -0.6 (5.2)                    | 3.8 (4.6)                       | 7.8 (4.8)           | 0.497                |
| VLDL-C mg/dL)                         | -4.8 (2.2)                    | <b>-5.7 (1.9) *</b>             | 0.9 (2.0)           | <b>0.049</b>         |

<sup>1</sup> All changes are from baseline to week 12.

<sup>2</sup> Analysis of covariance adjusted for intake.

<sup>3</sup> All values are mean (SD).

\* Statistically significantly difference vs. placebo by LSD *post hoc* test.

Bold values indicate statistical significance.

HDL-C, high-density lipoprotein cholesterol; LDL-C, low-density lipoprotein cholesterol; VLDL-C, very low-density lipoprotein cholesterol.
